# Supplementary material for: Fabrication of copper silicate microspheres using rice husk ash and its application for dearomatization of phenol derivatives
Source: Royal Society of Chemistry journal article supplement (doi:10.1039/d5ra09185c), 2025-01-01
Supplement: d5ra09185c1.pdf [file d5ra09185c1.pdf]

## Supplementary information

### **Fabrication of Copper Silicate Microspheres Using Rice Husk Ash and Its Application for Dearomatization of Phenol Derivatives**

Na Li,<sup>a</sup> Lide Su,<sup>a</sup> Hongying Wang,<sup>a</sup> Hongdao Li,<sup>b</sup> Qianqian Shen,<sup>\*c</sup> and Xiaofeng Han<sup>\*a</sup>

## Contents

|                                                  |    |
|--------------------------------------------------|----|
| Contents .....                                   | 2  |
| General information .....                        | 3  |
| Procedure for the gram-scale reaction of 3a..... | 4  |
| Characterization Data of Products.....           | 5  |
| Supporting figures .....                         | 8  |
| Mechanistic Studies .....                        | 20 |

## General information

All products were purified by flash chromatography on silica gel (200 - 300 mesh). Reactions were monitored by TLC analysis using silica gel GF-254 thin layer plates. The substrates **3a-3f** were described in the experimental procedures. NMR spectra were recorded with a Quantum-1 plus 400 MHz spectrometers (400 MHz for  $^1\text{H}$  NMR, 101 MHz for  $^{13}\text{C}$  NMR) or a Bruker Ascend™ 500 MHz Spectrometer (500 MHz for  $^1\text{H}$  NMR, 126 MHz for  $^{13}\text{C}$  NMR). NMR spectra were recorded in deuterated chloroform (7.26 ppm for  $^1\text{H}$  NMR, 77.16 ppm for  $^{13}\text{C}$  NMR) as a solvent and  $\text{Me}_4\text{Si}$  was used as the inert standard, Chemical shifts ( $\delta$  values) were reported in ppm. Coupling constants in hertz (Hz) were taken from the spectra directly and are uncorrected. Gas Chromatography (GC) was recorded on a GC 2030 from SHIMADZU.

### Procedure for the gram-scale reaction of 3a.

To a mixture of phenol (**1a**, 1.38 g, 10 mmol) and diethyl azodicarboxylate (**2**, 3.48 g, 20 mmol) in acetone (8.0 mL) in a 50 mL round-bottom flask, CuSi-NTMs (0.28 g, 20 mol%) was added. The mixture was stirred at room temperature for 2 hours. After the reaction was finished, the organic solvent was dried over anhydrous Na<sub>2</sub>SO<sub>4</sub>, filtered, and concentrated under reduced pressure. The residue was purified by chromatography (ethyl acetate: petroleum ether = 1 : 3) to afford the pure product 3.0 g (92%).

## Characterization Data of Products

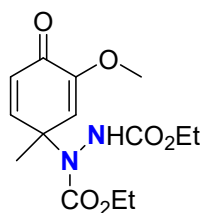

After purification by column chromatography, the final compound **3a** was obtained as a yellow oil.

$^1\text{H}$  NMR (500 MHz,  $\text{CDCl}_3$ )  $\delta$  7.28 – 7.02 (m, 2H), 6.87 – 6.61 (m, 1H), 6.13 (m, 1H), 4.18 (m, 2H), 4.06 (m, 2H), 1.84 (m, 3H), 1.47 (m, 3H), 1.27 (m, 3H), 1.11 (m, 3H).  $^{13}\text{C}$  NMR (126 MHz,  $\text{CDCl}_3$ )  $\delta$  186.04, 157.25, 155.37, 155.31, 152.02, 151.57, 147.42, 146.90, 133.61, 126.96, 126.86, 62.56, 62.30, 62.09, 60.75, 60.71, 60.40, 25.29, 25.26, 15.60, 14.41, 14.36, 14.12.

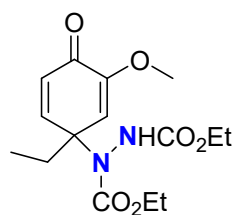

After purification by column chromatography, the final compound **3b** was obtained as a yellow oil.

$^1\text{H}$  NMR (500 MHz,  $\text{CDCl}_3$ )  $\delta$  7.11 – 6.77 (m, 2H), 6.68 (d,  $J$  = 6.4 Hz, 1H), 6.24 (dd,  $J$  = 10.1, 4.4 Hz, 1H), 4.19 (dtd,  $J$  = 17.8, 7.1, 4.0 Hz, 4H), 3.64 (d,  $J$  = 9.3 Hz, 3H), 2.01 (d,  $J$  = 3.9 Hz, 2H), 1.30 – 1.23 (m, 3H), 1.23 – 1.14 (m, 3H), 0.80 (dt,  $J$  = 7.4, 3.6 Hz, 3H).  $^{13}\text{C}$  NMR (126 MHz,  $\text{CDCl}_3$ )  $\delta$  181.11, 157.33, 155.43, 151.36, 150.52, 128.00, 116.77, 66.04, 62.71, 62.46, 56.25, 55.06, 55.02, 31.49, 30.59, 30.26, 29.74, 28.40, 14.54, 14.25, 8.34, 8.31.

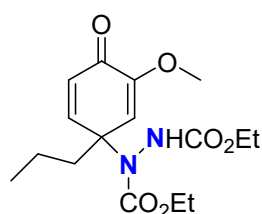

After purification by column chromatography, the final compound **3c** was obtained as a yellow oil.

$^1\text{H}$  NMR (400 MHz,  $\text{CDCl}_3$ )  $\delta$  7.20 (d,  $J$  = 8.4 Hz, 1H), 6.72 – 6.63 (m, 1H), 6.27 – 6.10 (m, 1H), 5.85 – 5.79 (m, 1H), 4.32 – 4.03 (m, 4H), 3.87 – 3.65 (m, 3H), 2.04 – 1.94 (m, 1H), 1.60 (m, 1H), 1.30 – 1.18

(m, 8H), 0.94 – 0.87 (m, 3H).  $^{13}\text{C}$  NMR (101 MHz,  $\text{CDCl}_3$ )  $\delta$  181.17, 157.36, 155.40, 150.98, 127.52, 127.42, 120.19, 117.33, 65.52, 62.60, 62.33, 56.15, 54.95, 54.91, 39.58, 37.51, 24.52, 17.23, 14.47, 14.41, 14.37, 14.35, 14.09.

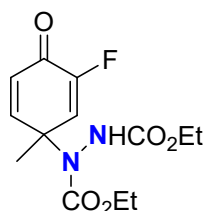

After purification by column chromatography, the final compound **3d** was obtained as a yellow oil.

$^1\text{H}$  NMR (500 MHz,  $\text{CDCl}_3$ )  $\delta$  7.17 (d,  $J$  = 20.3 Hz, 1H), 6.86 (dd,  $J$  = 25.3, 11.4 Hz, 1H), 6.44 (d,  $J$  = 12.5 Hz, 1H), 6.16 (dd,  $J$  = 17.1, 12.0 Hz, 1H), 4.22 – 4.07 (m, 4H), 1.55 (s, 3H), 1.30 – 1.18 (m, 3H), 1.14 (t,  $J$  = 7.2 Hz, 3H).  $^{13}\text{C}$  NMR (126 MHz,  $\text{CDCl}_3$ )  $\delta$  178.45, 178.27, 157.28, 155.07, 154.11, 152.89, 151.98, 126.07, 62.98, 62.56, 62.05, 25.49, 14.45.

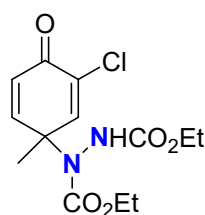

After purification by column chromatography, the final compound **3e** was obtained as a yellow oil.

$^1\text{H}$  NMR (500 MHz,  $\text{CDCl}_3$ )  $\delta$  7.10 – 6.56 (m, 3H), 6.24 (dd,  $J$  = 11.6, 9.9 Hz, 1H), 4.30 – 4.04 (m, 4H), 1.54 (s, 3H), 1.33 – 1.21 (m, 3H), 1.14 (s, 3H).  $^{13}\text{C}$  NMR (126 MHz,  $\text{CDCl}_3$ )  $\delta$  178.43, 157.34, 155.36, 152.36, 147.48, 126.12, 63.08, 62.57, 62.30, 25.07, 14.49, 14.47.

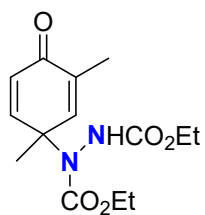

After purification by column chromatography, the final compound **3f** was obtained as a yellow oil.

$^1\text{H}$  NMR (500 MHz,  $\text{CDCl}_3$ )  $\delta$  7.27 - 6.99 (m, 2H), 6.87 - 6.61 (m, 1H), 6.13 (m, 1H), 4.19 (m, 2H), 4.06 (m, 2H), 1.84 (d,  $J$  = 6.9 Hz, 3H), 1.47 (m, 3H), 1.27 - 1.23 (m, 3H), 1.11 (m, 3H).  $^{13}\text{C}$  NMR (126 MHz,  $\text{CDCl}_3$ )  $\delta$  186.04, 157.25, 155.37, 155.31, 152.02, 151.57, 147.42, 146.90, 133.61, 126.96, 126.86, 62.56, 62.30, 62.09, 60.75, 60.71, 60.40, 25.29, 25.26, 15.60, 14.41, 14.36, 14.12.

## Supporting figures

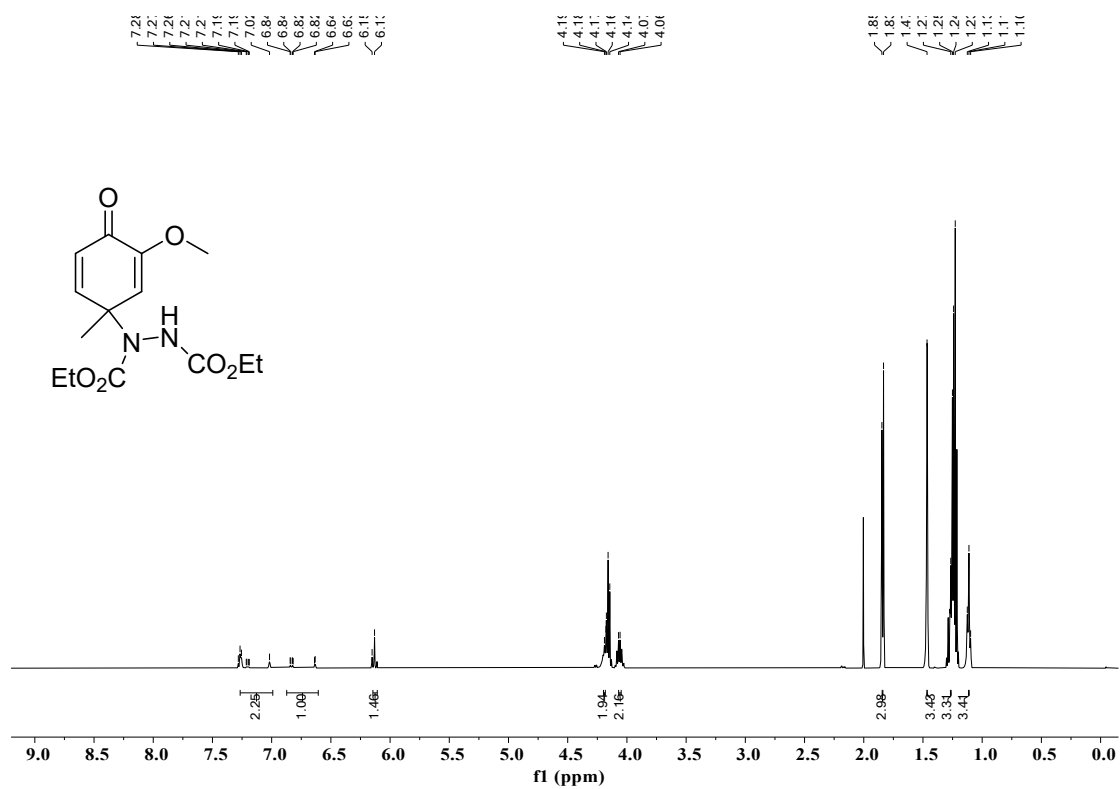

**Fig. S1.** <sup>1</sup>H NMR spectrum of **3a** in CDCl<sub>3</sub>.



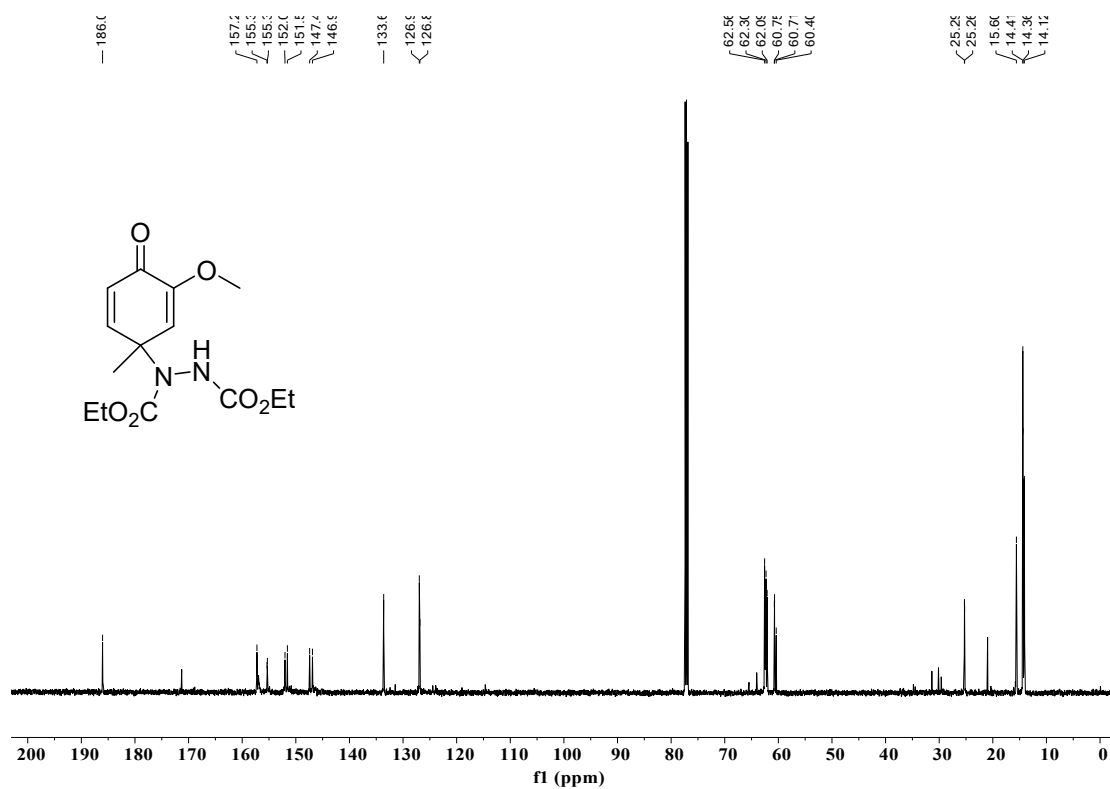

**Fig. S2.**  $^{13}\text{C}$  NMR spectrum of **3a** in CDCl<sub>3</sub>.

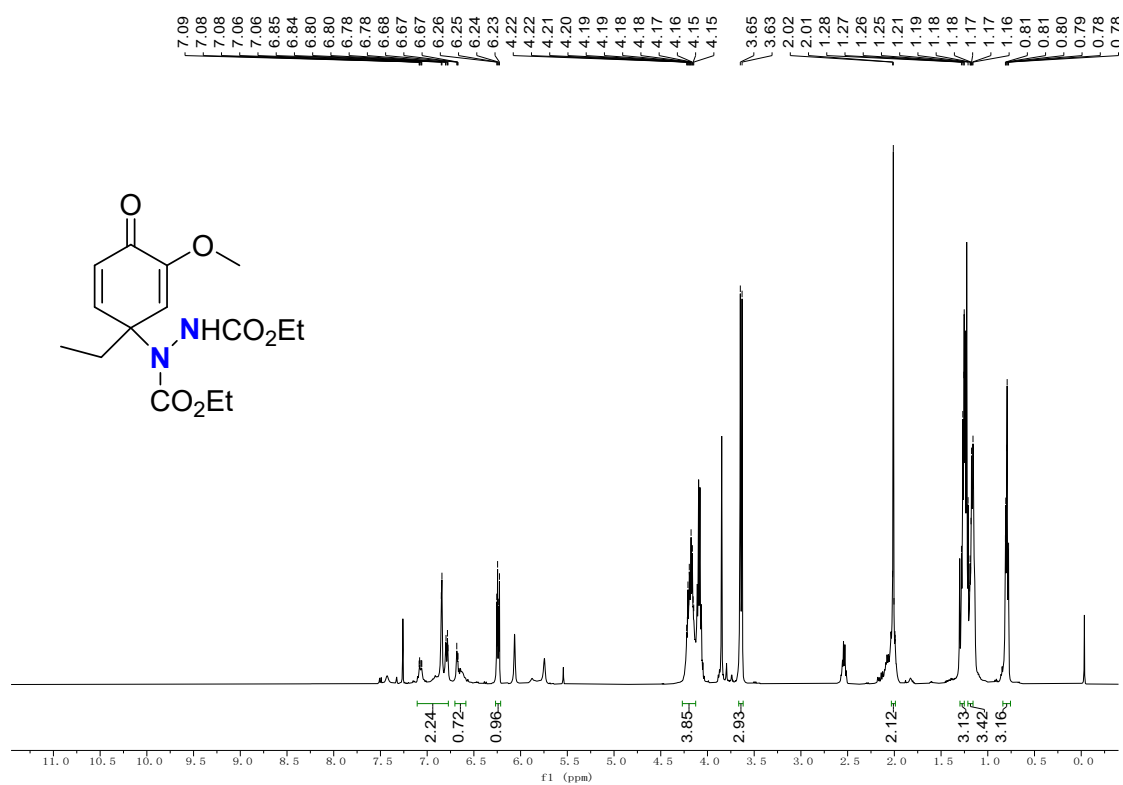

**Fig. S3.** <sup>1</sup>H NMR spectrum of **3b** in CDCl<sub>3</sub>.

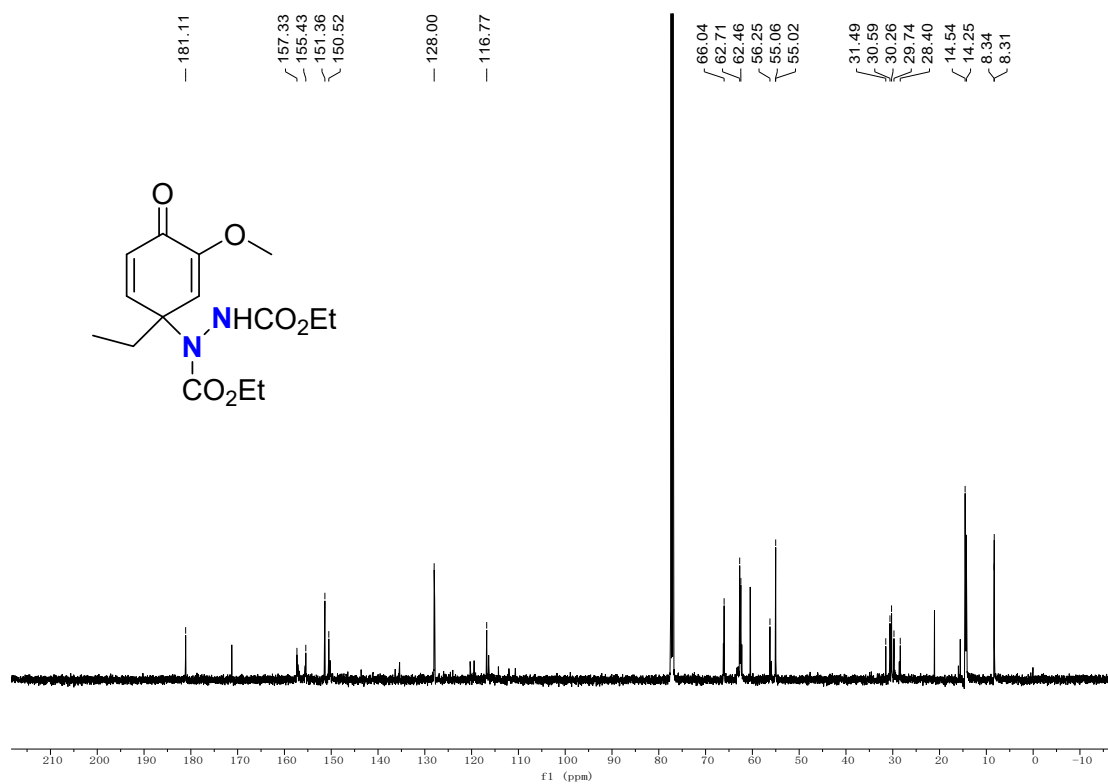

**Fig. S4.** <sup>13</sup>C NMR spectrum of **3b** in CDCl<sub>3</sub>.

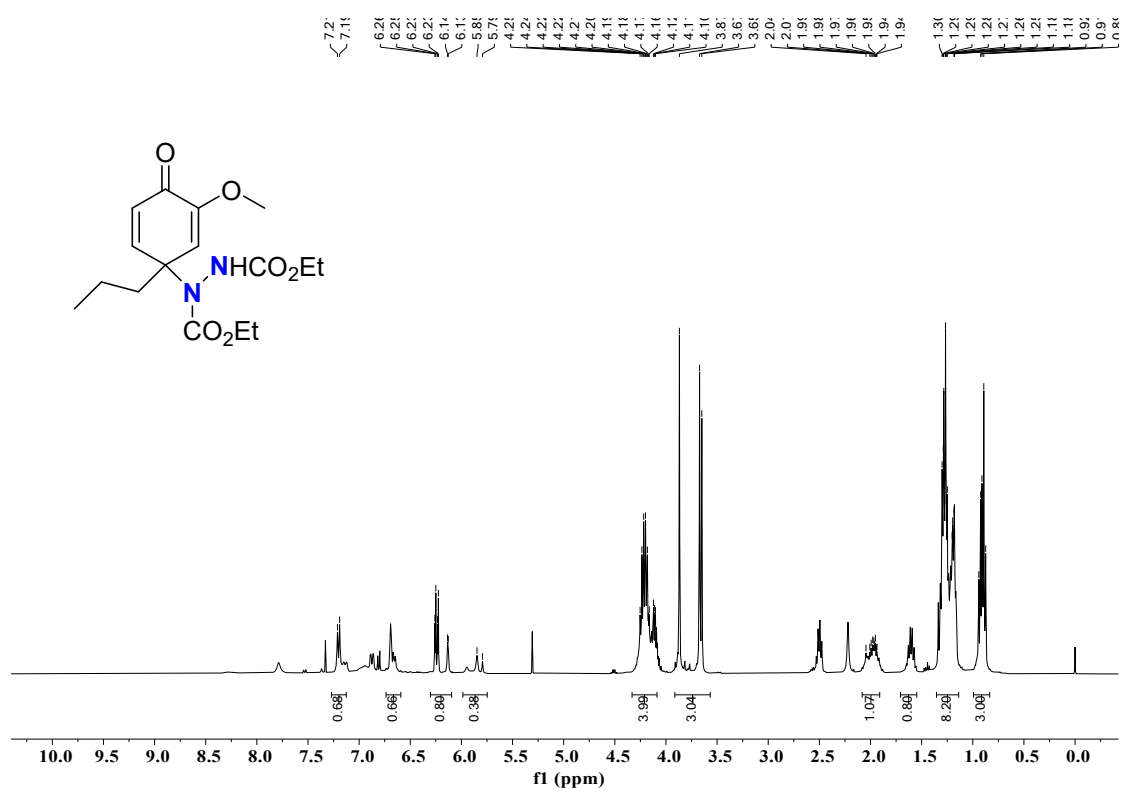

Fig. S5.  $^1\text{H}$  NMR spectrum of **3c** in  $\text{CDCl}_3$ .

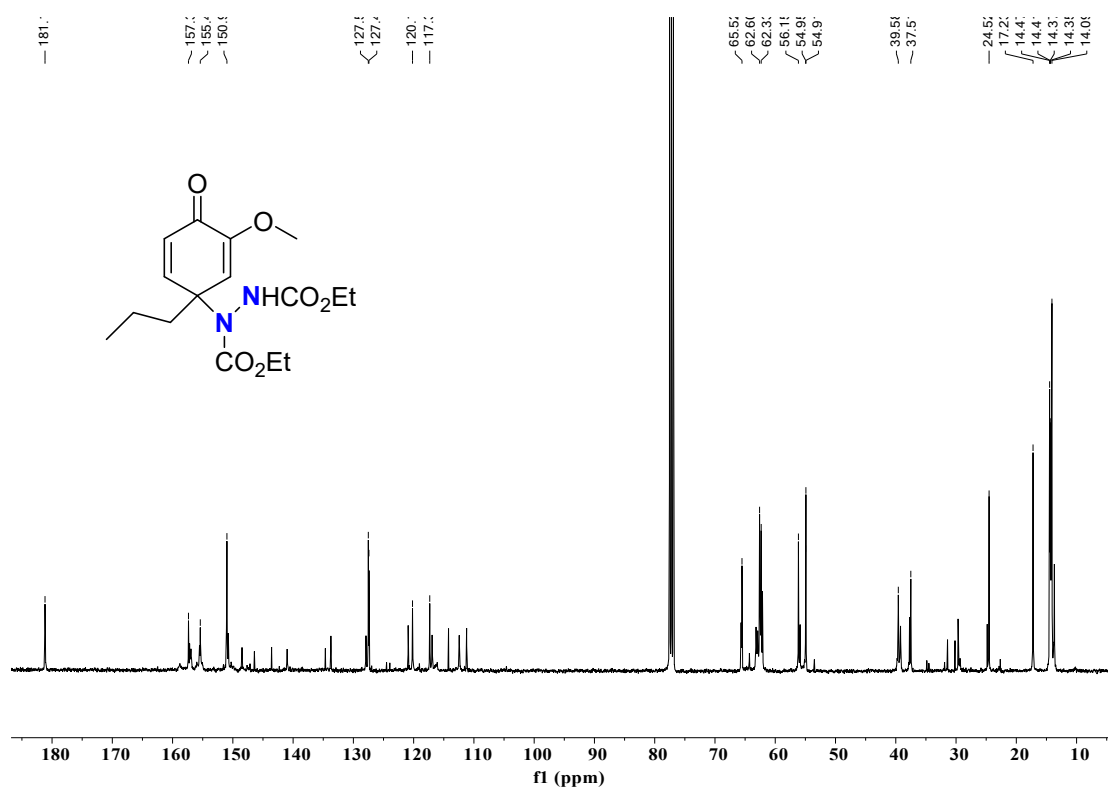

**Fig. S6.** <sup>13</sup>C NMR spectrum of **3c** in CDCl<sub>3</sub>.

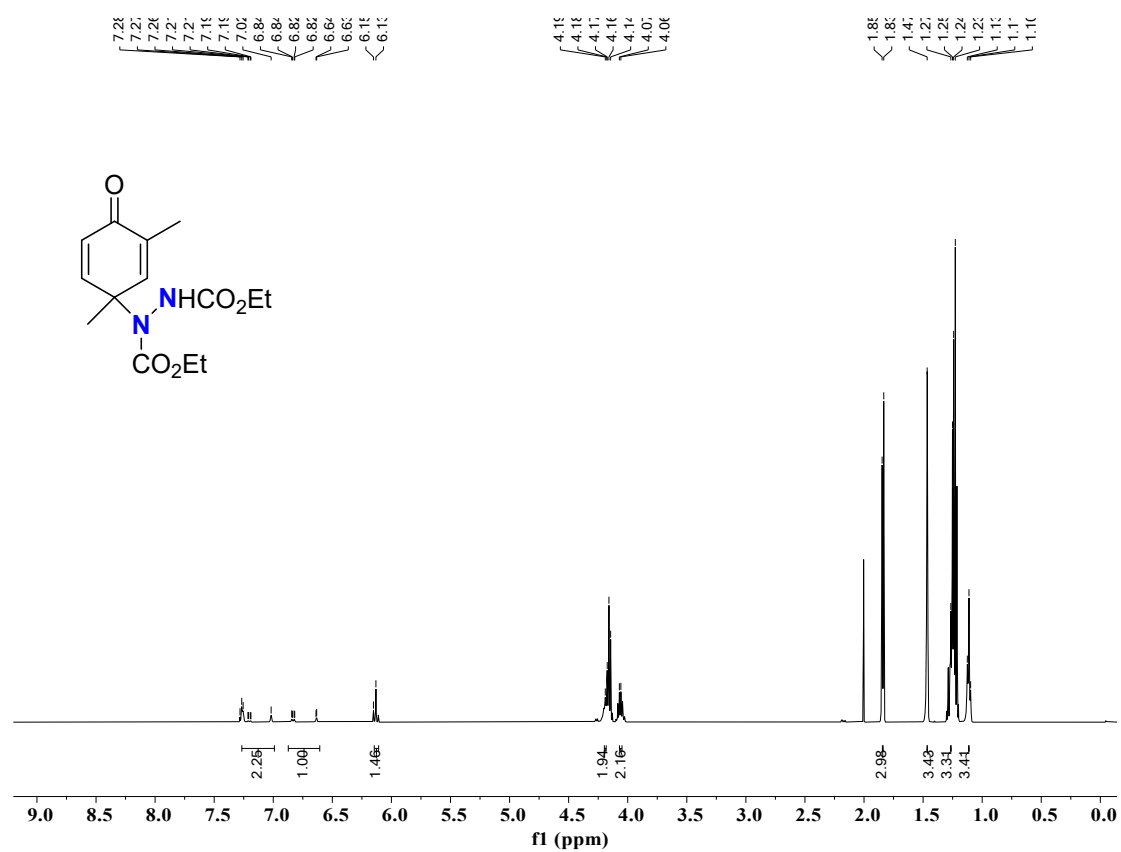

**Fig. S7.** <sup>1</sup>H NMR spectrum of **3d** in CDCl<sub>3</sub>.

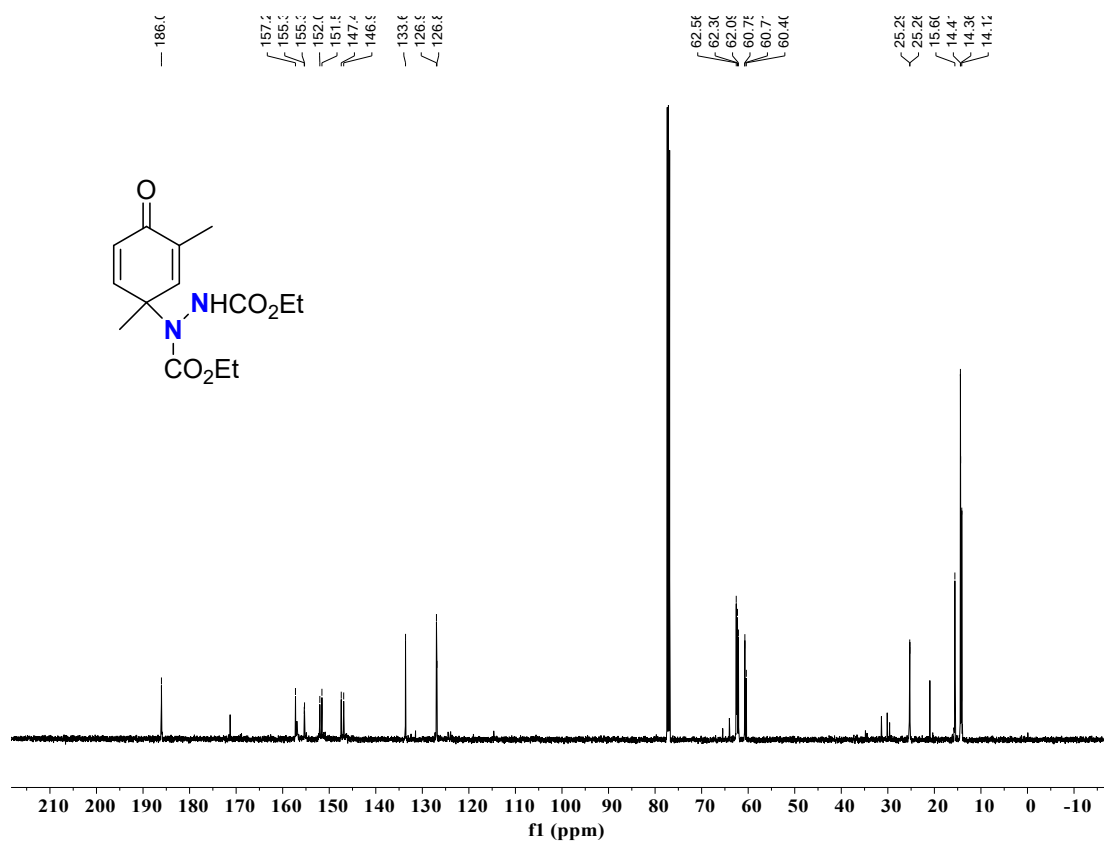

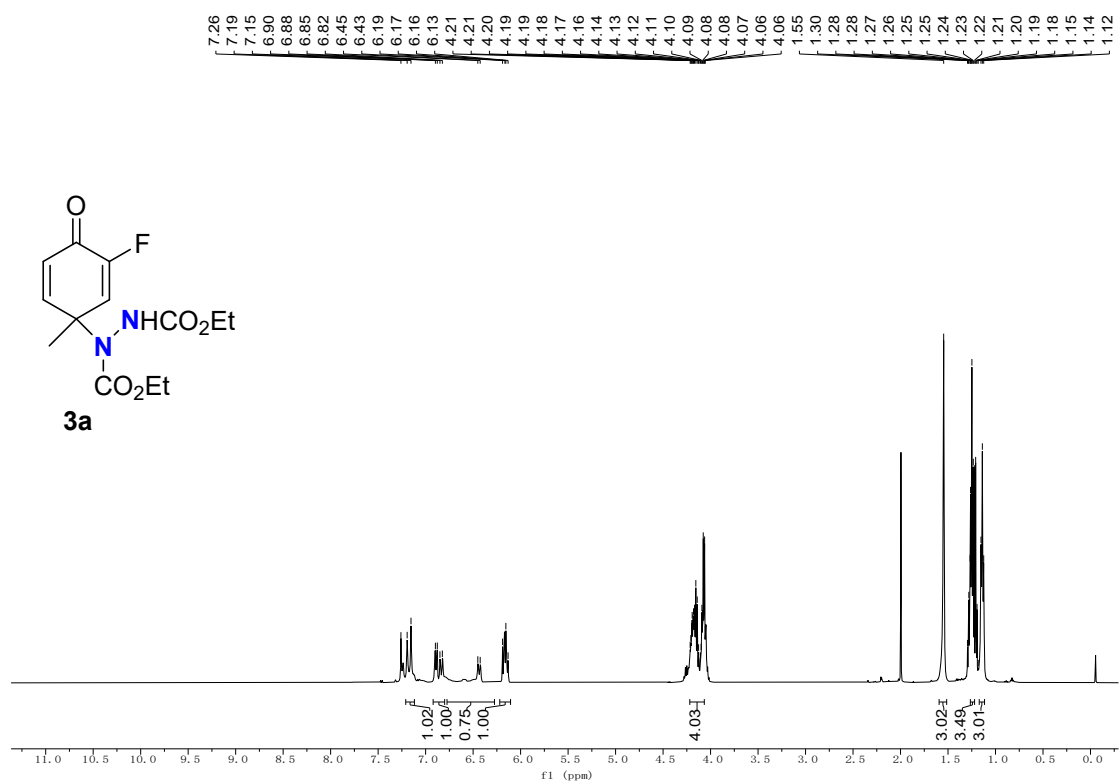

**Fig. S9.** <sup>1</sup>H NMR spectrum of **3e** in CDCl<sub>3</sub>.



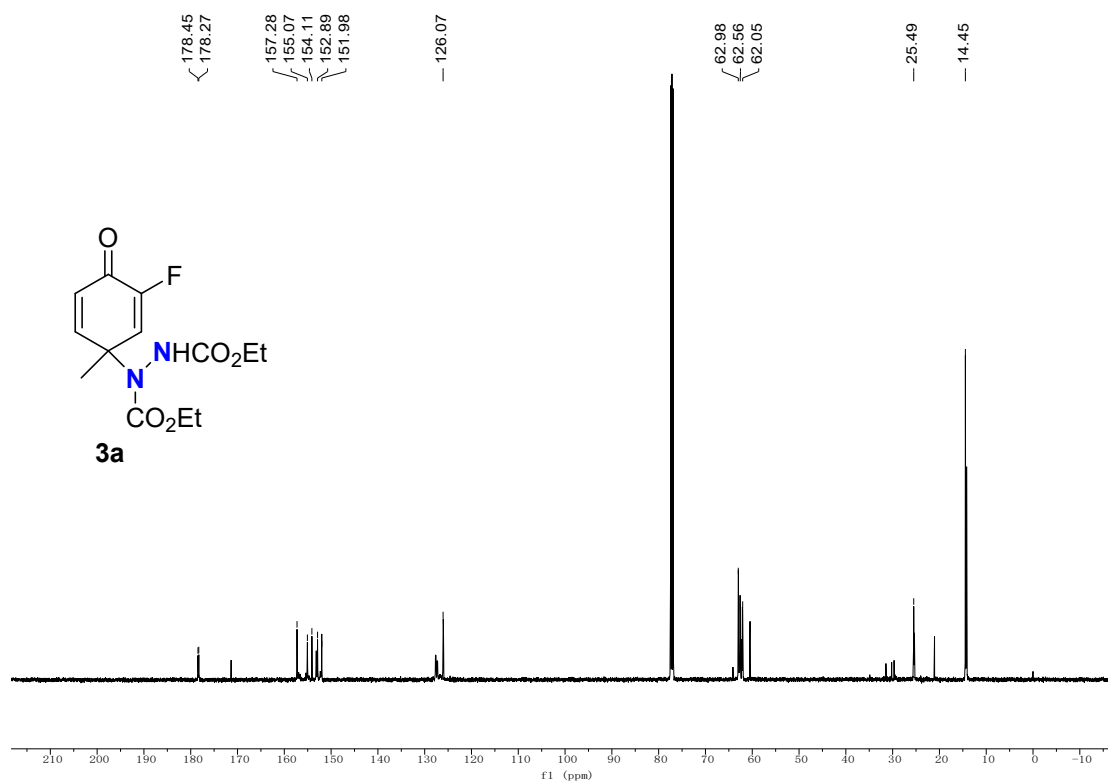

**Fig. S10.** <sup>13</sup>C NMR spectrum of **3e** in CDCl<sub>3</sub>.

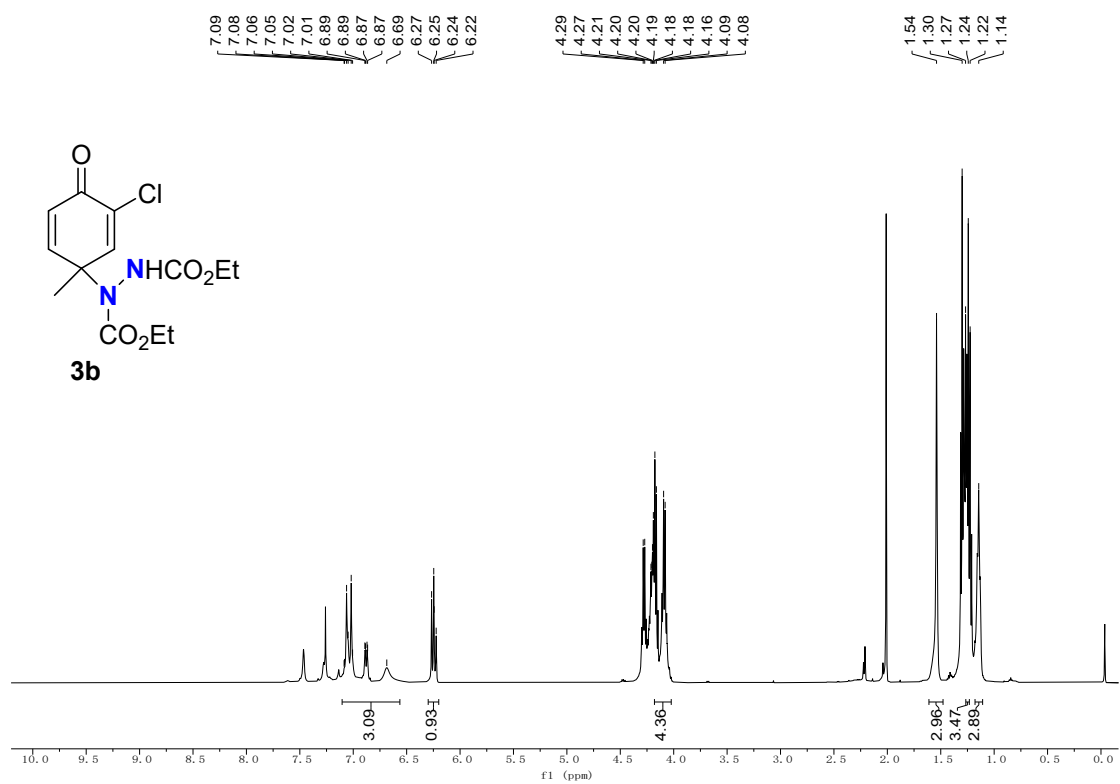

**Fig. S11.** <sup>1</sup>H NMR spectrum of **3f** in CDCl<sub>3</sub>.

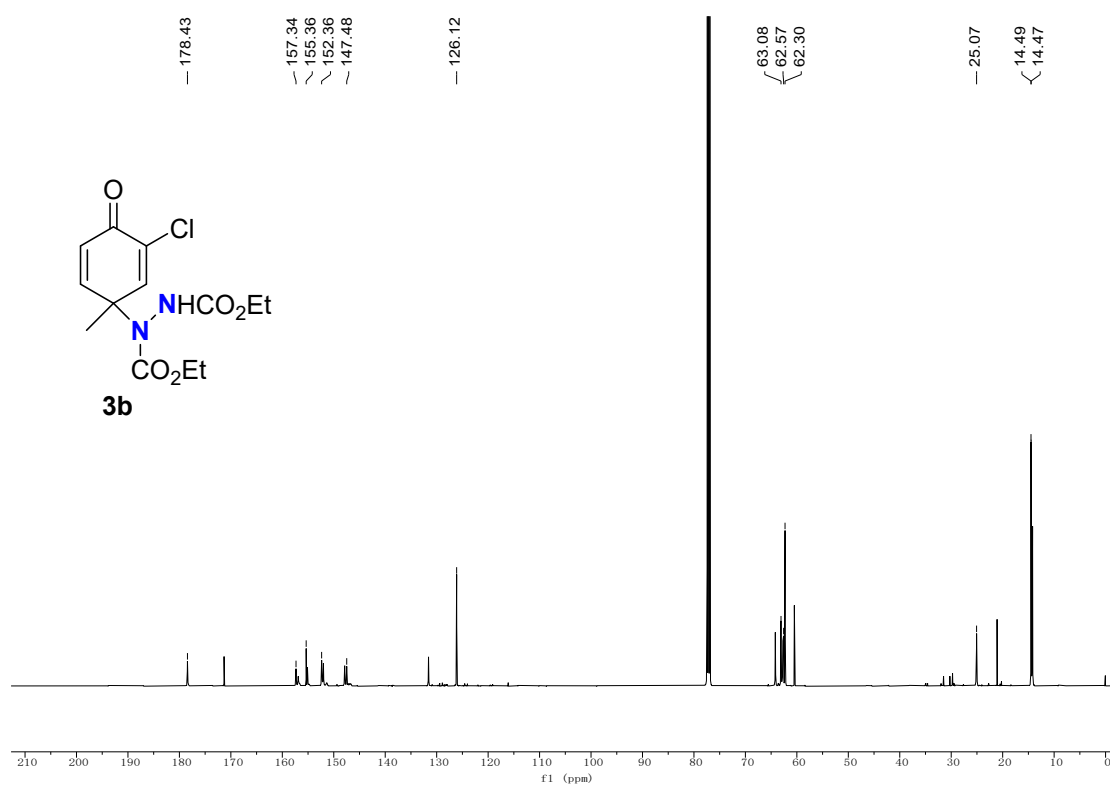

**Fig. S12.** <sup>13</sup>C NMR spectrum of **3f** in CDCl<sub>3</sub>.

## Mechanistic Studies

To a mixture of phenol (**1a**, 0.1 mmol) and diethyl azodicarboxylate (**2**, 0.2 mmol) in acetone (1.0 mL) in a round-bottom flask, CuSi-NTMs (20 mol%) and TEMPO (0.2 mmol) was added. The mixture was stirred at room temperature for 2 hours. After the reaction was finished, 20  $\mu\text{L}$  of the reaction mixture was diluted with 300  $\mu\text{L}$  of EtOAc containing dodecane as an internal standard. The sample was dried over anhydrous  $\text{Na}_2\text{SO}_4$  and further analyzed by gas chromatography (GC). GC method: The temperature profile was 100  $^\circ\text{C}$  holding for 0.5 min; 20  $^\circ\text{C min}^{-1}$  to 150 $^\circ\text{C}$  holding for 2 min; 30  $^\circ\text{C min}^{-1}$  to 220 $^\circ\text{C}$  for 2.0 min.

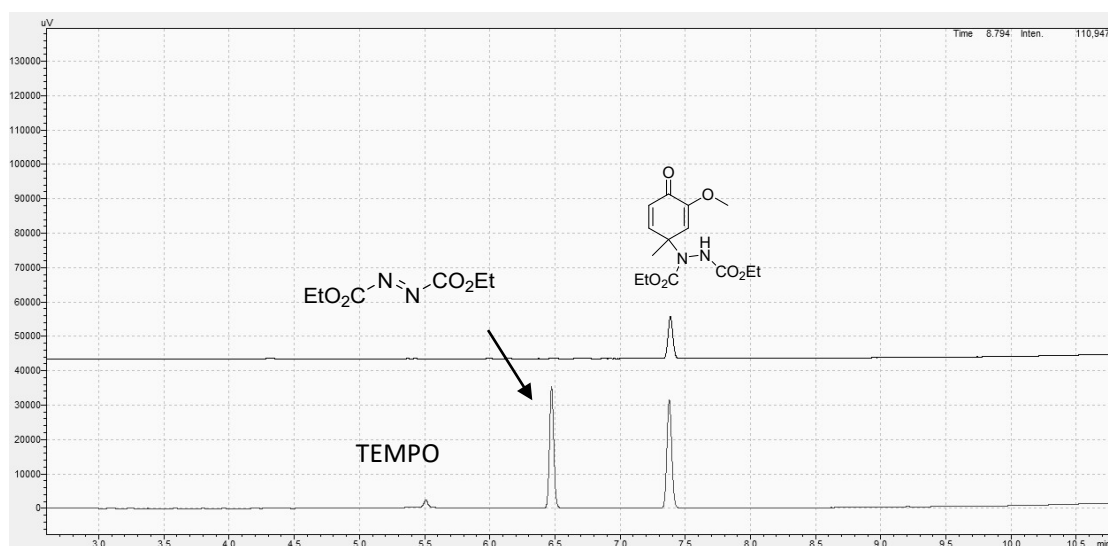

**Fig. S13.** GC chromatogram of mechanistic studies.
